# Supplementary material
Source: ML conference proceedings conference paper supplement (https://openreview.net/forum?id=Lwr8We4MIxn)
Supplement: supplementary_material [file attachment]

# **Codes and Data Availability**

**Data Availability**

The data is collected in-house and due to proprietary reasons, the data cannot be released.

## **Codes**

The following is a short description of all the codes that are used and uploaded with the submission.

Our codes contain 6 different folders. Here, we describe each of these folders along with some description about the files within each folder.

**Preprocessing**

The codes within this folder have been used to generate the data which is used in repeated 10-fold cross validation and during pretraining.

**create_train_test_gcn_joint_mode.m:** This matlab code is used to generate the training and validation data which is used during pretraining.

**create_multiple_runs.m:** This matlab code is used to generate the training, validation, and test split of out imaging genetics data which are used for repeated 10-fold cross validations.

**cv_partiton.m:** This code is used to generate train and validation indices.

**generate_training_nback.m:** Here we generate the contrast maps of our training Nback data which are used as imaging inputs to our model.

**generate_training_sdmt.m:** Here we generate the contrast maps of our training SDMT data which are used as imaging inputs to our model.

**generate_testing_nback.m:** This generates the contrast maps of out testing Nback data.

**generate_testing_sdmt.m:** This generates the contrast maps of out testing SDMT data.

**Pretraining**

The codes within this folder are used to pretrain the genetic branch and the classifier of GUIDE.

**wrapper.py:** This python code is used to train the genetic branch and the classifier of our model. We save the performance for each epoch which are later used.

**find_checkpoints.m:** Here we track the validation performance to find the early stopping point.

**model_random.py:** The model architecture of the genetic branch and classifier of GUIDE.

**net_train.py, net_test.py:** These scripts used to train and test our model.

**Cross Validation**

The codes within this folder are used to cross validate GUIDE. The performance obtained here is shown in Table. 1.

**wrapper_img.py:** We warm start out model and train it on the imaging-genetics data in repeated 10-fold validation setting. This script trains the model, saves the intermediate results, plot them, and also store the model parameters as checkpoints.

**model_joint.py:** Full model architecture of GUIDE.

**net_train_joint.py:** The script to train the model using backpropagation.

**Compare Random Graphs**

The codes within this folder are used to train HG-ACN, and HG-DCN with random graphs.

**wrapper.py:** This python script is used to train the genetic branch using random graph embedding. We save the performance for each epoch which are later used.

**find_checkpoint.m**: Here we track the validation performance to find the early stopping point.

**run_checkpoint_on_img_gen_data.py:** Using the checkpoint model we evaluate the performance over the 208 test data as described in Section. 3.6 of manuscript.

**run_checkpoint_on_training_img_gen_data.py:** Using the checkpoint model we evaluate the performance over the training data.

**net_train.py, net_test.py:** These scripts used to train and test our model.

**model_random.py:** The model architecture of the genetic branch.

**Bayes_vs_kshap**

**Guide_importance -> guide_topk_importance.py:** This python script is used to identify top-K imaging features using Bayes importance. They are then used to mask the test data of each fold. The script saves the testing performance which is later compared with K-SHAP.

**Shap_importance -> shap_importance.py:** This python script is used to identify top-K imaging features using K-SHAP. This script stores the testing performance and the K-SHAP values of each feature which are later used for comparison, as described in Section. 3.6 of manuscript.

**evaluate_performance.m:** This script identifies the early stopping epoch for each fold based on lowest validation loss.

**importance_compare.m:** It compares and plots the testing performance as shown in Figure. 2 of manuscript.

**guide_bayes_cross_cosine:** Plots the pairwise cosine similarity across fold for Bayes feature selection scheme.

**shap_cross_cosine:** Plots the pairwise cosine similarity across fold for K-SHAP feature selection scheme.

**Identifying Pathways**

This set of codes are used to identify paths that exist between each root node and leaf node and are associated with the disorder.

**wrapper.py:** This python script train GUIDE over multiple random subsets of the data as explained in Section. 3.6 of the manuscript.

**find_checkpoint.m**: Here we track the validation performance to find the early stopping point.

**extract_iterations.py:** This python script uses the checkpoint models of GUIDE to store interaction scores between each pair node.

**find_all_path.py:** It finds and stores all possible paths that exist between each root node and each leaf node.

**remaining_paths_to_run.py:** It prepares the paths that will then fed to logistic regression model to identify potential discriminative pathways.

**lrt_logistic_regression_multiple_pretrain.py:** This takes in the patient specific interaction scores as input and runs logistic regression followed by likelihood ratio test. The p-values of the statistical test are stores for further evaluation.

**pathway_importance.m:** This script identifies statistically significant pathways.

**embed_pathway_and_display.py:** Embeds the pathway information using t-SNE and display 10 different categories of pathways.

**Auxilliary Codes**

**convert_to_cpu.py:** Sends a tensor to CPU.

**convert_to_gpu.py:** Sends a tensor to GPU.

**convert_to_gpu_and_tensor.py:** Converts an array to tensor and sends to GPU.

**convert_to_gpu_scalar.py:** Converts a scalar to tensor and sends to GPU.
